# Supplementary material
Source: Royal Society of Chemistry journal article supplement (doi:10.1039/d6fo01304j)

Fig. S1 The full blot image (uncropped and unprocessed) of FXR, CYP7A1, TGR5, SREBP-1 and  $\beta$ -actin of HpeG2 cell in the Fig. 3.

Fig. S2 The full blot image (uncropped and unprocessed) of FXR, CYP7A1, TGR5, FGFR4 and  $\beta$ -actin of liver in the Fig. 9.

Fig. S3 The full blot image (uncropped and unprocessed) of FXR, FGF15 and  $\beta$ -actin of gut in the Fig. 9.

Fig. S4 The HPLC chromatograms of HPC.

Fig. S1

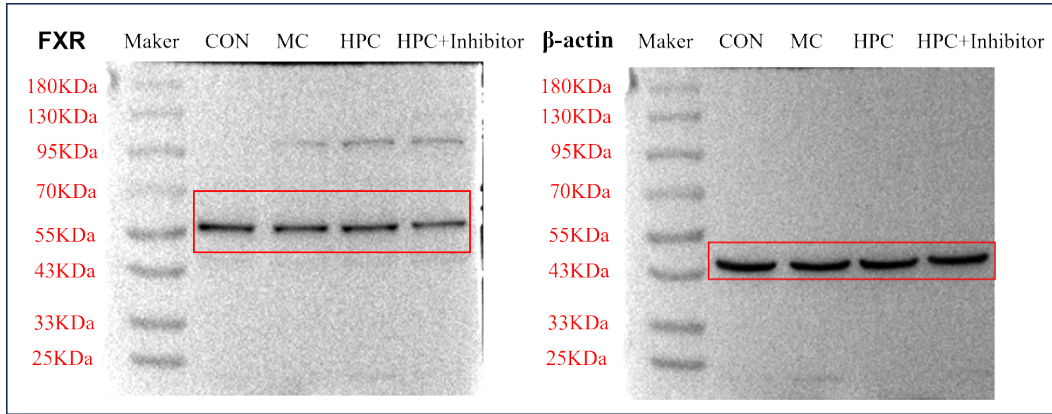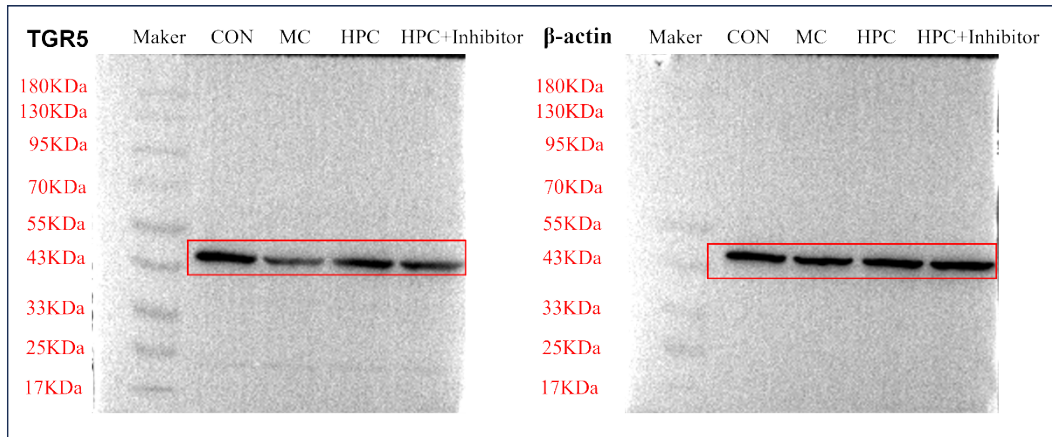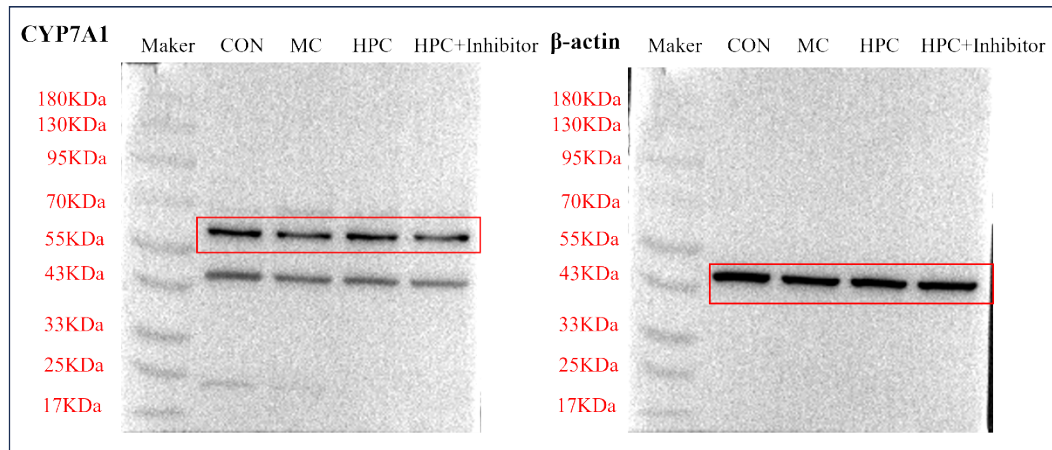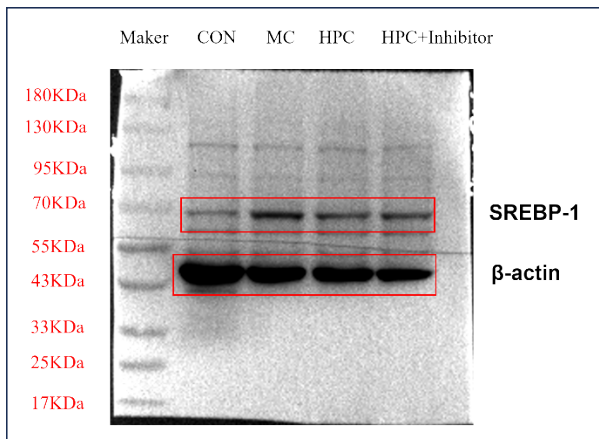

Fig. S2

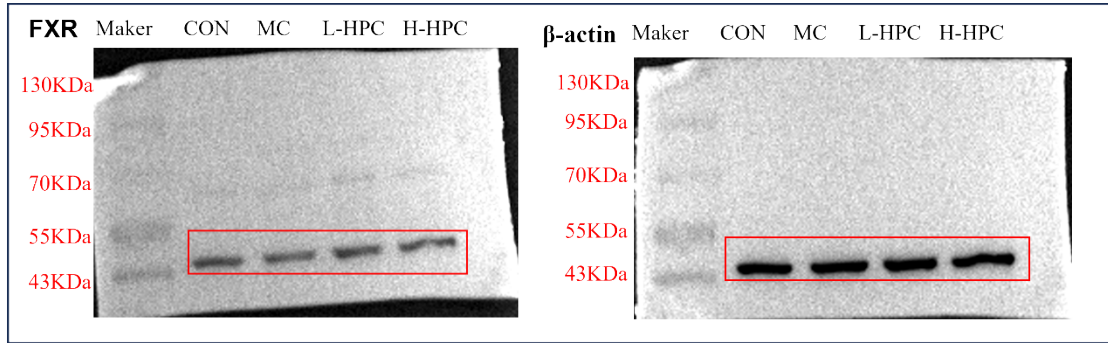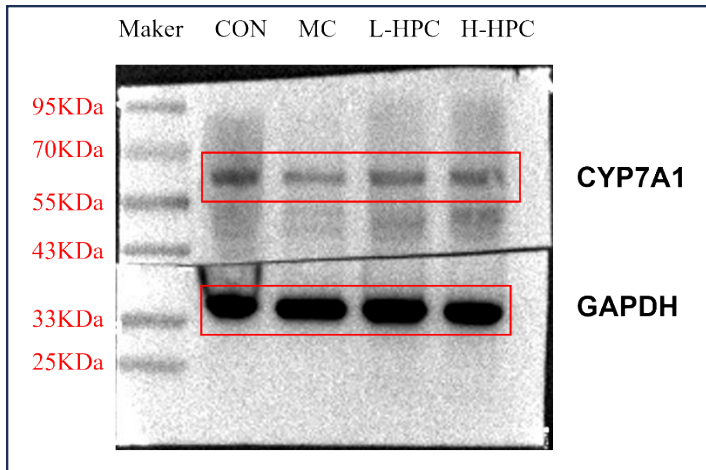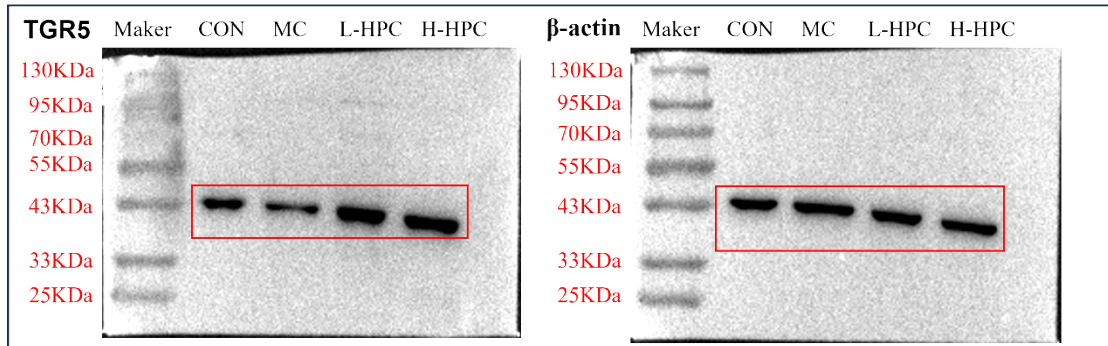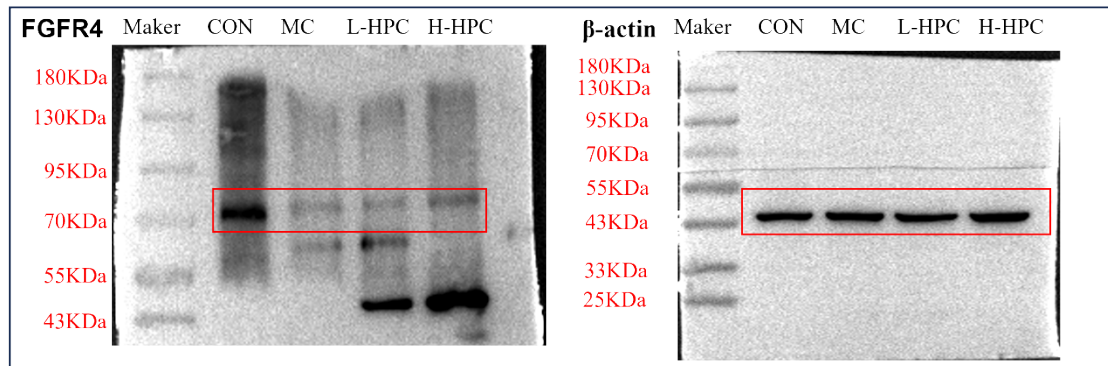

Fig. S3

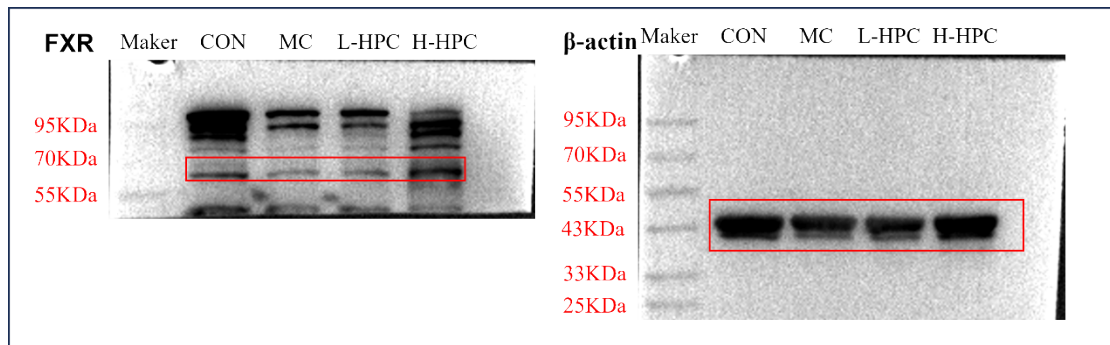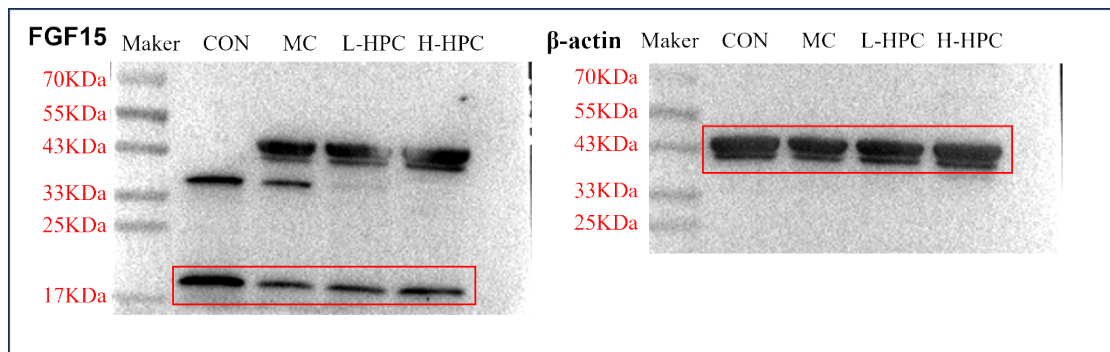

Fig. S4

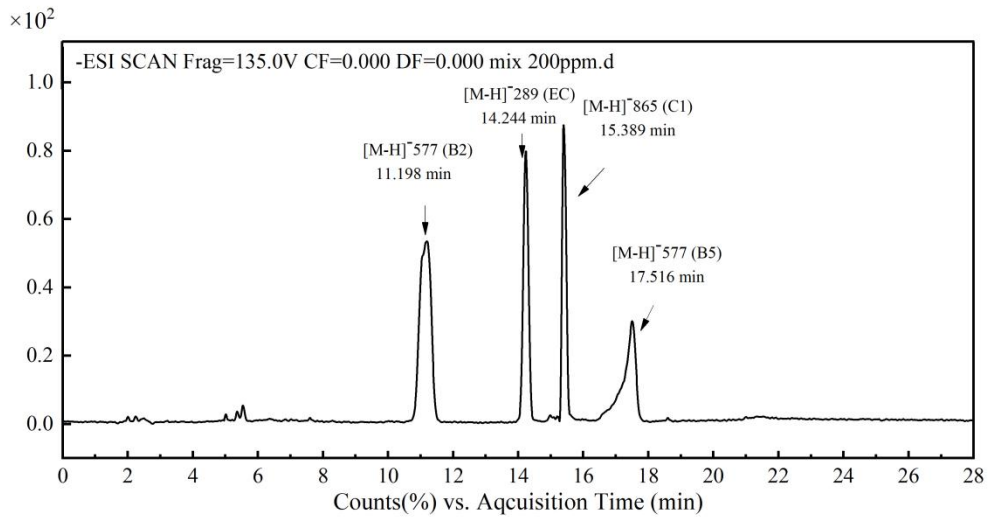

Supplement: d6fo01304j1.pdf [file d6fo01304j1.pdf]
